# Supplementary material
Source: publisher site journal article supplement (https://www.dovepress.com/article/335742)
Supplement: Supplementary file 1 [file get_supplementary_file.php]

**Supplement**

**Search Details**

We combined search strings for ‘disease’, ‘exacerbation’ and ‘subsequent exacerbation events’ using the AND operator.

Disease:

"Pulmonary Disease, Chronic Obstructive"[Mesh] OR COPD[tw] OR “chronic obstructive pulmonary disease”[tw] OR COAD[tw] OR “chronic obstructive airway disease”[tw] OR “chronic obstructive lung disease”[tw] OR “chronic bronchitis”[tw] OR emphysema[tw] OR “chronic airflow obstruction”[tw]

Exacerbations:

exacerbation*[tiab]

Subsequent Exacerbation Events:

(fail*[tw] AND treatment[tw]) OR re-exacerbat*[tw] OR relapse[tw] OR recurrence[tw] OR non-recovery[tw] OR recovery[tw] OR prolong*[tw]

***Geographic Distribution and Population Clustering of Included Articles***

Geographic distribution and population clustering of the 47 included articles:

Canada (4); China (5); Denmark (1), France (1), Greece (1), India (1), Ireland (1), The Netherlands (1), Spain (9), Turkey (2), UK (8), USA (7), USA/Canada (3), Multi-country (2), Macedonia (1).

The eight studies from the United Kingdom were all from the London COPD cohort, an open outpatient-based cohort of the London Chest Hospital that began in 1995 with participating patients filling out symptoms on daily diary cards (Seemungal, Donaldson et al. 2000, Donaldson, Seemungal et al. 2003, Wilkinson, Donaldson et al. 2004, Perera, Hurst et al. 2007, Hurst, Donaldson et al. 2009, Aaron, Donaldson et al. 2012, Mackay, Donaldson et al. 2014, Donaldson, Law et al. 2015). The two studies from Turkey were from the same study population, with one paper using a subgroup of the larger study population (Durmaz, Goksu et al. 2015, Durmaz, Goksu et al. 2015).

The study from Denmark created a population-based cohort from Danish healthcare databases (Johannesdottir, Christiansen et al. 2013). The study from Ireland presented results from a COPD discharge program pilot study for patients hospitalized with acute exacerbations of COPD (Cushen, McCormack et al. 2016). The study from the Netherlands created a cohort of primary care patients from practices that participated in the Registration Network Groningen (Bathoorn, Groenhof et al. 2017). The study from France used a retrospective cohort crated from medical records for patients treated for AECOPD in intensive care units (Planquette, Peron et al. 2015). The study from Macedonia analyzed data from COPD patients admitted with moderate exacerbations of bacterial origin (Minov, Stoleski et al. 2018). The study from Greece analyzed data from COPD patients admitted for acute exacerbations of COPD (Bartziokas, Papaioannou et al. 2014).

Three of the nine American studies were conducted using Premier’s Perspective, a voluntary fee-supported databased developed for measuring quality and healthcare utilization (Lindenauer, Pekow et al. 2010, Rothberg, Pekow et al. 2010, Rothberg, Pekow et al. 2010). Participating hospitals (n=375) represent all geographical regions of the USA and are primarily small to medium-sized nonteaching hospitals in urban areas. Two other American studies were from Veterans Affairs Medical Centers (Adams, Melo et al. 2000, Dewan, Rafique et al. 2000). One study included Veterans Affairs Medical Centers and other non-VA hospitals, (Yount, Atwood et al. 2019) and the last study was non-VA hospital based (Vondracek and Hemstreet 2006).

The 3 USA/Canada studies were based on the Multicenter Airway Research Collaboration (MARC), based in 29 emergency departments in 15 US states and three Canadian provinces (Cydulka, Rowe et al. 2003, Kim, Emerman et al. 2004, Tsai, Rowe et al. 2009).

The two multi-country studies were from the GIANT Study, a prospective multicenter observational non-interventional study to collect data on the epidemiology and outcomes of patients with acute exacerbations of chronic bronchitis and COPD with all patients treated with moxifloxacin (Miravitlles, Anzueto et al. 2009, Anzueto, Miravitlles et al. 2012). The GIANT study was based in Asia-Pacific, Europe, the Americas, and the Middle East/Africa. One of the multi-country studies only included data form the European subset of GIANT countries (Miravitlles, Anzueto et al. 2009).

Seven of the nine studies from Spain had Miravitlles as first author or co-author however based on study period, setting, and study names, they did not seem to have overlapping study populations (Miravitlles, Murio et al. 2001, Miravitlles, Zalacain et al. 2003, Miravitlles, Llor et al. 2005, Miravitlles, Izquierdo et al. 2011, Matkovic, Huerta et al. 2012, Domenech, Ardanuy et al. 2013, Miravitlles, Garcia-Polo et al. 2013, Garcia-Sidro, Naval et al. 2015, Crisafulli, Torres et al. 2016).

The four studies from Canada (Aaron, Vandemheen et al. 2002, Beauchesne, Julien et al. 2008, Stiell, Perry et al. 2018, Farias, Sedeno et al. 2019) and the five studies from China had distinct study populations (Wang, Zang et al. 2012, Chang and Yao 2014, Liu, Peng et al. 2015, Liang, Chen et al. 2017, Hu, Lhamo et al. 2019).

The study from India prospectively followed patients admitted to a tertiary care center for COPD (Gaude, Rajesh et al. 2015). The study from Denmark created a population-based cohort from Danish healthcare databases (Johannesdottir, Christiansen et al. 2013). The study from Ireland presented results from a COPD discharge program pilot study for patients hospitalized with acute exacerbations of COPD (Cushen, McCormack et al. 2016). The study from the Netherlands created a cohort of primary care patients from practices that participated in the Registration Network Groningen (Bathoorn, Groenhof et al. 2017). The study from France used a retrospective cohort crated from medical records for patients treated for AECOPD in intensive care units (Planquette, Peron et al. 2015). The study from Macedonia analyzed data from COPD patients admitted with moderate exacerbations of bacterial origin (Minov, Stoleski et al. 2018). The study from Greece analyzed data from COPD patients admitted for acute exacerbations of COPD (Bartziokas, Papaioannou et al. 2014).

**Supplement Reference List**

Aaron, S. D., G. C. Donaldson, G. A. Whitmore, J. R. Hurst, T. Ramsay and J. A. Wedzicha (2012). "Time course and pattern of COPD exacerbation onset." Thorax **67**(3): 238-243.

Aaron, S. D., K. L. Vandemheen, J. J. Clinch, J. Ahuja, R. J. Brison, G. Dickinson and P. C. Hebert (2002). "Measurement of short-term changes in dyspnea and disease-specific quality of life following an acute COPD exacerbation." Chest **121**(3): 688-696.

Adams, S. G., J. Melo, M. Luther and A. Anzueto (2000). "Antibiotics are associated with lower relapse rates in outpatients with acute exacerbations of COPD." Chest **117**(5): 1345-1352.

Anzueto, A., M. Miravitlles, S. Ewig, D. Legnani, S. Heldner and K. Stauch (2012). "Identifying patients at risk of late recovery (>/= 8 days) from acute exacerbation of chronic bronchitis and COPD." Respir Med **106**(9): 1258-1267.

Bartziokas, K., A. I. Papaioannou, S. Loukides, A. Papadopoulos, A. Haniotou, S. Papiris and K. Kostikas (2014). "Serum uric acid as a predictor of mortality and future exacerbations of COPD." Eur Respir J **43**(1): 43-53.

Bathoorn, E., F. Groenhof, R. Hendrix, T. van der Molen, B. Sinha, H. A. Kerstjens, A. W. Friedrich and J. W. Kocks (2017). "Real-life data on antibiotic prescription and sputum culture diagnostics in acute exacerbations of COPD in primary care." Int J Chron Obstruct Pulmon Dis **12**: 285-290.

Beauchesne, M. F., M. Julien, L. A. Julien, D. Piquette, A. Forget, M. Labrecque and L. Blais (2008). "Antibiotics used in the ambulatory management of acute COPD exacerbations." Int J Chron Obstruct Pulmon Dis **3**(2): 319-322.

Chang, C. and W. Yao (2014). "Time course of inflammation resolution in patients with frequent exacerbations of chronic obstructive pulmonary disease." Med Sci Monit **20**: 311-320.

Crisafulli, E., A. Torres, A. Huerta, M. Guerrero, A. Gabarrus, A. Gimeno, R. Martinez, N. Soler, L. Fernandez, J. A. Wedzicha and R. Menendez (2016). "Predicting In-Hospital Treatment Failure (</= 7 days) in Patients with COPD Exacerbation Using Antibiotics and Systemic Steroids." COPD **13**(1): 82-92.

Cushen, B., N. McCormack, K. Hennigan, I. Sulaiman, R. W. Costello and B. Deering (2016). "A pilot study to monitor changes in spirometry and lung volume, following an exacerbation of Chronic Obstructive Pulmonary Disease (COPD), as part of a supported discharge program." Respir Med **119**: 55-62.

Cydulka, R. K., B. H. Rowe, S. Clark, C. L. Emerman and C. A. Camargo, Jr. (2003). "Emergency department management of acute exacerbations of chronic obstructive pulmonary disease in the elderly: the Multicenter Airway Research Collaboration." J Am Geriatr Soc **51**(7): 908-916.

Dewan, N. A., S. Rafique, B. Kanwar, H. Satpathy, K. Ryschon, G. S. Tillotson and M. S. Niederman (2000). "Acute exacerbation of COPD: factors associated with poor treatment outcome." Chest **117**(3): 662-671.

Domenech, A., C. Ardanuy, R. Pallares, I. Grau, S. Santos, A. G. De la Campa and J. Linares (2013). "Some pneumococcal serotypes are more frequently associated with relapses of acute exacerbations in COPD patients." PLoS One **8**(3): e59027.

Donaldson, G. C., M. Law, B. Kowlessar, R. Singh, S. E. Brill, J. P. Allinson and J. A. Wedzicha (2015). "Impact of Prolonged Exacerbation Recovery in Chronic Obstructive Pulmonary Disease." Am J Respir Crit Care Med **192**(8): 943-950.

Donaldson, G. C., T. A. Seemungal, I. S. Patel, S. J. Lloyd-Owen, T. M. Wilkinson and J. A. Wedzicha (2003). "Longitudinal changes in the nature, severity and frequency of COPD exacerbations." Eur Respir J **22**(6): 931-936.

Durmaz, D., E. Goksu, T. Kilic, O. Ozbudak and O. Eray (2015). "The role of nitric oxide in predicting revisit of patients with exacerbated chronic obstructive pulmonary disease." J Emerg Med **48**(2): 247-253.

Durmaz, D., E. Goksu, G. Yildiz, A. Unal, M. Kartal, A. Oskay and Y. Simsek (2015). "The Factors Influencing Relapse in Patients Presenting to the Emergency Department with COPD Exacerbation." Turk J Emerg Med **15**(2): 59-63.

Farias, R., M. Sedeno, D. Beaucage, I. Drouin, I. Ouellet, A. Joubert, R. Abimaroun, M. Patel, M. Abou Rjeili and J. Bourbeau (2019). "Innovating the treatment of COPD exacerbations: a phone interactive telesystem to increase COPD Action Plan adherence." BMJ Open Respir Res **6**(1): e000379.

Garcia-Sidro, P., E. Naval, C. Martinez Rivera, M. Bonnin-Vilaplana, J. L. Garcia-Rivero, A. Herrejon, R. Malo de Molina, P. J. Marcos, S. Mayoralas-Alises, J. A. Ros, M. Valle, C. Esquinas, M. Barrecheguren and M. Miravitlles (2015). "The CAT (COPD Assessment Test) questionnaire as a predictor of the evolution of severe COPD exacerbations." Respir Med **109**(12): 1546-1552.

Gaude, G. S., B. P. Rajesh, A. Chaudhury and J. Hattiholi (2015). "Outcomes associated with acute exacerbations of chronic obstructive pulmonary disorder requiring hospitalization." Lung India **32**(5): 465-472.

Hu, W. P., T. Lhamo, D. Liu, J. Q. Hang, F. Y. Zhang, Y. H. Zuo, Y. Y. Zeng and J. Zhang (2019). "Development of a Nomogram to Predict the Risk of 30-Day Re-Exacerbation for Patients Hospitalized for Acute Exacerbation of Chronic Obstructive Pulmonary Disease." Copd **16**(2): 160-167.

Hurst, J. R., G. C. Donaldson, J. K. Quint, J. J. Goldring, R. Baghai-Ravary and J. A. Wedzicha (2009). "Temporal clustering of exacerbations in chronic obstructive pulmonary disease." Am J Respir Crit Care Med **179**(5): 369-374.

Johannesdottir, S. A., C. F. Christiansen, M. B. Johansen, M. Olsen, X. Xu, J. M. Parker, N. A. Molfino, T. L. Lash and J. P. Fryzek (2013). "Hospitalization with acute exacerbation of chronic obstructive pulmonary disease and associated health resource utilization: a population-based Danish cohort study." J Med Econ **16**(7): 897-906.

Kim, S., C. L. Emerman, R. K. Cydulka, B. H. Rowe, S. Clark and C. A. Camargo (2004). "Prospective multicenter study of relapse following emergency department treatment of COPD exacerbation." Chest **125**(2): 473-481.

Liang, Y., Y. Chen, R. Wu, M. Lu, W. Yao, J. Kang, B. Cai, X. Zhou, Z. Liu, P. Chen, D. Sun, J. Zheng, G. Wang, Y. Feng and Y. Xu (2017). "Chronic bronchitis is associated with severe exacerbation and prolonged recovery period in Chinese patients with COPD: a multicenter cross-sectional study." J Thorac Dis **9**(12): 5120-5130.

Lindenauer, P. K., P. S. Pekow, M. C. Lahti, Y. Lee, E. M. Benjamin and M. B. Rothberg (2010). "Association of corticosteroid dose and route of administration with risk of treatment failure in acute exacerbation of chronic obstructive pulmonary disease." Jama **303**(23): 2359-2367.

Liu, D., S. H. Peng, J. Zhang, S. H. Bai, H. X. Liu and J. M. Qu (2015). "Prediction of short term re-exacerbation in patients with acute exacerbation of chronic obstructive pulmonary disease." Int J Chron Obstruct Pulmon Dis **10**: 1265-1273.

Mackay, A. J., G. C. Donaldson, A. R. Patel, R. Singh, B. Kowlessar and J. A. Wedzicha (2014). "Detection and severity grading of COPD exacerbations using the exacerbations of chronic pulmonary disease tool (EXACT)." Eur Respir J **43**(3): 735-744.

Matkovic, Z., A. Huerta, N. Soler, R. Domingo, A. Gabarrus, A. Torres and M. Miravitlles (2012). "Predictors of adverse outcome in patients hospitalised for exacerbation of chronic obstructive pulmonary disease." Respiration **84**(1): 17-26.

Minov, J., S. Stoleski, T. Petrova, K. Vasilevska, D. Mijakoski and J. Bislimovska-Karadzhinska (2018). "Moxifloxacin in the Outpatient Treatment of Moderate Exacerbations of Chronic Obstructive Pulmonary Disease." Open Access Maced J Med Sci **6**(11): 2017-2022.

Miravitlles, M., A. Anzueto, S. Ewig, D. Legnani and K. Stauch (2009). "Characterisation of exacerbations of chronic bronchitis and COPD in Europe: the GIANT study." Ther Adv Respir Dis **3**(6): 267-277.

Miravitlles, M., C. Garcia-Polo, A. Domenech, G. Villegas, F. Conget and C. de la Roza (2013). "Clinical outcomes and cost analysis of exacerbations in chronic obstructive pulmonary disease." Lung **191**(5): 523-530.

Miravitlles, M., I. Izquierdo, A. Herrejon, J. V. Torres, E. Baro, J. Borja and E. investigators (2011). "COPD severity score as a predictor of failure in exacerbations of COPD. The ESFERA study." Respir Med **105**(5): 740-747.

Miravitlles, M., C. Llor, K. Naberan, J. M. Cots, J. Molina and E. s. group (2005). "Variables associated with recovery from acute exacerbations of chronic bronchitis and chronic obstructive pulmonary disease." Respir Med **99**(8): 955-965.

Miravitlles, M., C. Murio and T. Guerrero (2001). "Factors associated with relapse after ambulatory treatment of acute exacerbations of chronic bronchitis. DAFNE Study Group." Eur Respir J **17**(5): 928-933.

Miravitlles, M., R. Zalacain, C. Murio, M. Ferrer, J. L. Alvarez-Sala, J. F. Masa, H. Verea, F. Ros and R. Vidal (2003). "Speed of recovery from acute exacerbations of chronic obstructive pulmonary disease after treatment with antimicrobials : results of a two-year study." Clin Drug Investig **23**(7): 439-450.

Perera, W. R., J. R. Hurst, T. M. Wilkinson, R. J. Sapsford, H. Müllerova, G. C. Donaldson and J. A. Wedzicha (2007). "Inflammatory changes, recovery and recurrence at COPD exacerbation." Eur Respir J **29**(3): 527-534.

Planquette, B., J. Peron, E. Dubuisson, A. Roujansky, V. Laurent, A. Le Monnier, S. Legriel, A. Ferre, F. Bruneel, P. G. Chiles and J. P. Bedos (2015). "Antibiotics against Pseudomonas aeruginosa for COPD exacerbation in ICU: a 10-year retrospective study." Int J Chron Obstruct Pulmon Dis **10**: 379-388.

Rothberg, M. B., P. S. Pekow, M. Lahti, O. Brody, D. J. Skiest and P. K. Lindenauer (2010). "Antibiotic therapy and treatment failure in patients hospitalized for acute exacerbations of chronic obstructive pulmonary disease." Jama **303**(20): 2035-2042.

Rothberg, M. B., P. S. Pekow, M. Lahti, O. Brody, D. J. Skiest and P. K. Lindenauer (2010). "Comparative effectiveness of macrolides and quinolones for patients hospitalized with acute exacerbations of chronic obstructive pulmonary disease (AECOPD)." J Hosp Med **5**(5): 261-267.

Seemungal, T. A., G. C. Donaldson, A. Bhowmik, D. J. Jeffries and J. A. Wedzicha (2000). "Time course and recovery of exacerbations in patients with chronic obstructive pulmonary disease." Am J Respir Crit Care Med **161**(5): 1608-1613.

Stiell, I. G., J. J. Perry, C. M. Clement, R. J. Brison, B. H. Rowe, S. D. Aaron, A. D. McRae, B. Borgundvaag, L. A. Calder, A. J. Forster, J. Brinkhurst and G. A. Wells (2018). "Clinical validation of a risk scale for serious outcomes among patients with chronic obstructive pulmonary disease managed in the emergency department." CMAJ **190**(48): E1406-E1413.

Tsai, C. L., B. H. Rowe and C. A. Camargo, Jr. (2009). "Factors associated with short-term recovery of health status among emergency department patients with acute exacerbations of chronic obstructive pulmonary disease." Qual Life Res **18**(2): 191-199.

Vondracek, S. F. and B. A. Hemstreet (2006). "Retrospective evaluation of systemic corticosteroids for the management of acute exacerbations of chronic obstructive pulmonary disease." Am J Health Syst Pharm **63**(7): 645-652.

Wang, L., X. Y. Zang, Q. Zhang, S. Y. Liu, Y. H. Shen and Y. Zhao (2012). "Study on factors influencing recrudescent time of postdischarge patients with chronic obstructive pulmonary disease." J Clin Nurs **21**(11-12): 1507-1514.

Wilkinson, T. M., G. C. Donaldson, J. R. Hurst, T. A. Seemungal and J. A. Wedzicha (2004). "Early therapy improves outcomes of exacerbations of chronic obstructive pulmonary disease." Am J Respir Crit Care Med **169**(12): 1298-1303.

Yount, S. E., C. Atwood, J. Donohue, R. D. Hays, D. Irwin, N. K. Leidy, H. Liu, K. L. Spritzer and D. A. DeWalt (2019). "Responsiveness of PROMIS(R) to change in chronic obstructive pulmonary disease." J Patient Rep Outcomes **3**(1): 65.
